# Supplementary material
Source: publisher site journal article supplement (https://neobiota.pensoft.net/article/67950/download/suppl/31/)
Supplement: Supplementary file 1

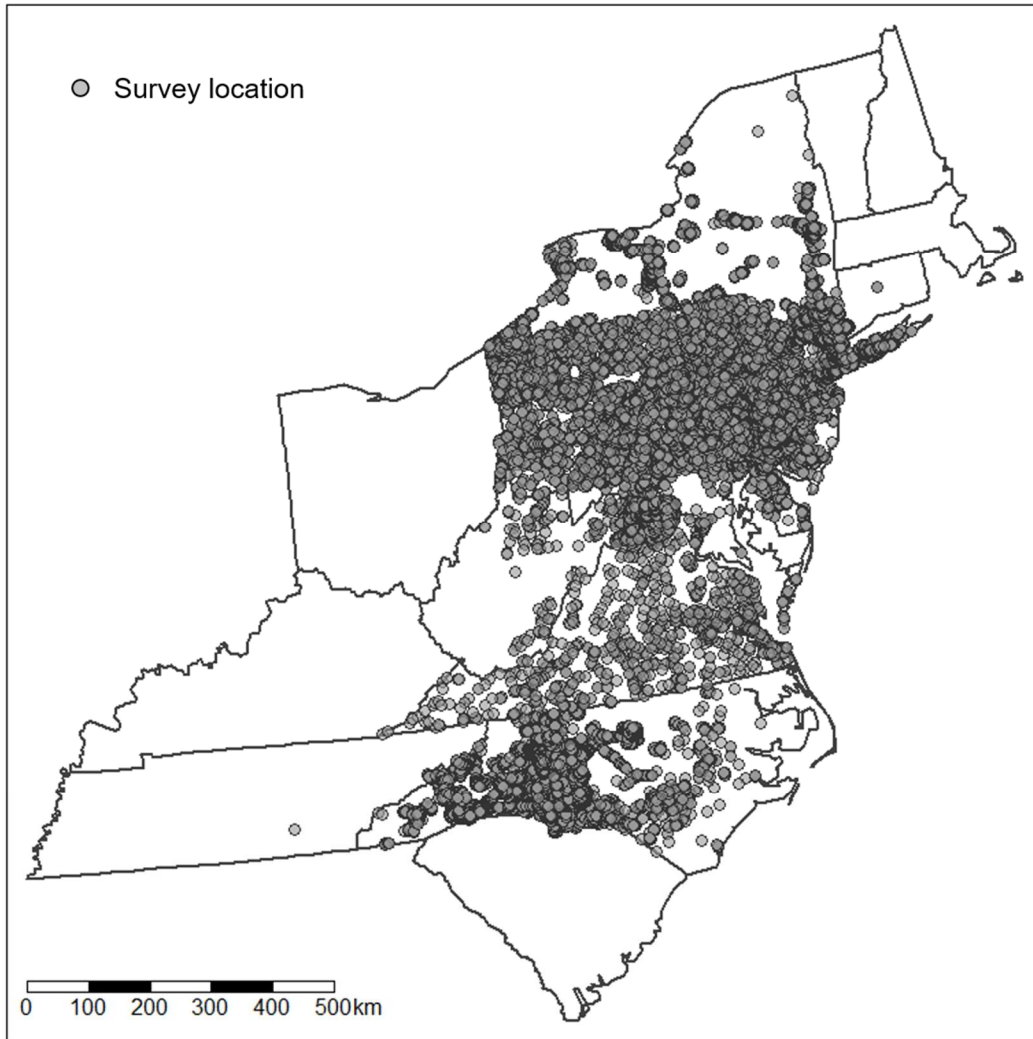

**Figure S1. Distribution of survey locations.** Locations of SLF visual surveys conducted by the US Animal and Plant Health Inspection Service and Pennsylvania Department of Agriculture.
